# Supplementary material
Source: PubMed Central journal article supplement (PMC1559457)

### **Figure S1 Phylogenetic tree of Vps29**

A phylogenetic tree (ClustalX, neighbour joining, corrections with multiple substitutions, random generator seed value 111, bootstrap trials 1000) of selected Vps29 amino acid sequences (including predicted sequences based on whole genome and EST sequences available in public databases) from various domains of life including metazoans, plants, fungi and protozoans is shown. Database entries are given in the FASTA definition line in the accompanying FASTA file (Figure S2 supplementary material). The Vps29 related archaeal metallo-phosphatase MJ0936 was used as an out-group to root the tree.

### **Figure S2 FASTA files of Vps29 amino acid sequences**

FASTA files of Vps29 amino acid sequences used for the multiple sequence alignment (Figure S1 supplementary material) and the phylogenetic tree (Figure S3 supplementary material) construction of Vps29. NCBI database entry accession codes, whole genome sequence contigs, ESTs, or TIGR Clustered (TC prefix) EST sequences are given in the FASTA definition line. Protein sequences derived from nucleotide sequence entries were conceptually translated. It should be noted that conceptual translations of draft whole genome sequences must be considered preliminary.

### **Figure S3 Multiple sequence alignment of Vps29**

ClustalW multiple sequence alignment of selected Vps29 amino acid sequences (including predicted sequences based on whole genome and EST sequences available in public databases) from various domains of life including metazoans, plants, fungi and protozoans (from top to bottom) is shown. The alignment was exported to Microsoft WORD using the CHROMA sequence analysis software package. Database entries are given in the FASTA definition line in the accompanying FASTA file (Figure S2 supplementary material). The five sequence motifs (I-V) that lie in loops connecting the core secondary structure elements and contain active site residues are indicated. Active site residues are indicated by an asterisk. Amino acids are numbered according to the human Vps29 sequence.

# Supplementary Figure 1

M.jannaschii MJ0936

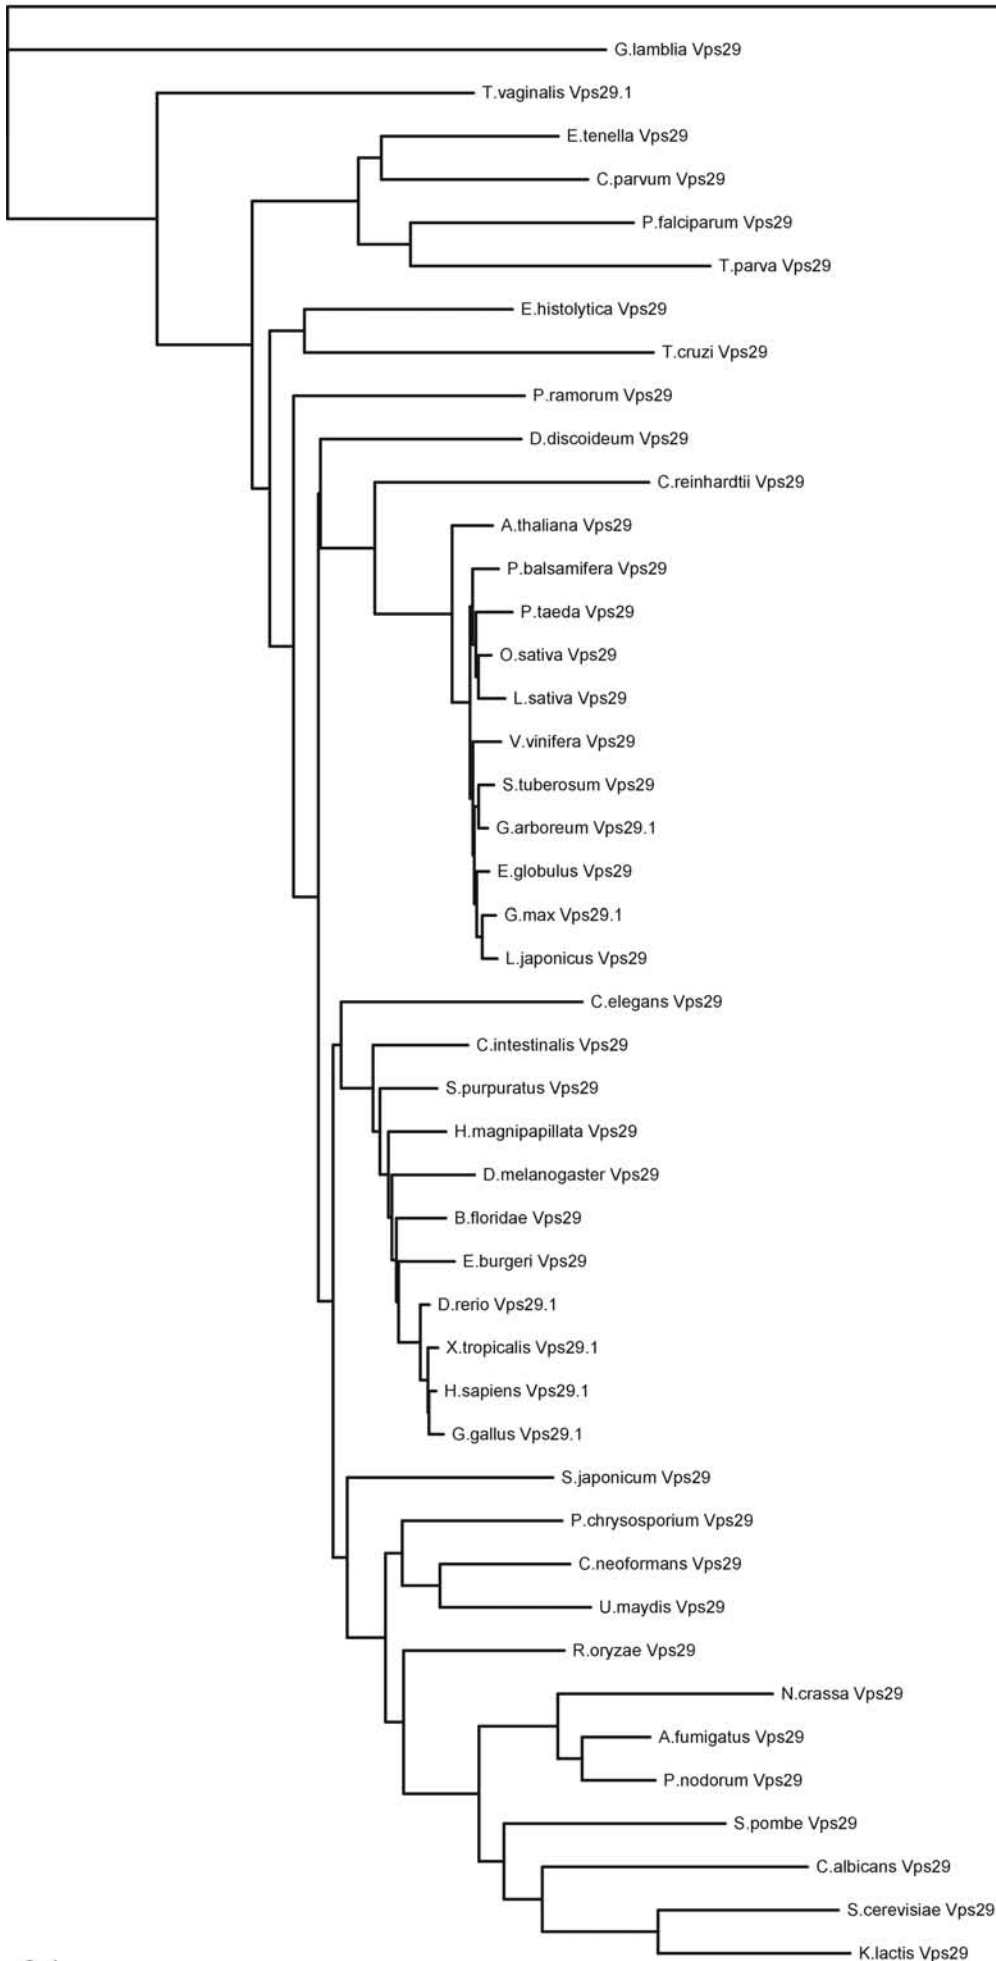

# Supplementary Figure 2

**Selected Vps29 sequences used for multiple sequence alignment and phylogenetic tree construction. NCBI database entry accession codes, whole genome sequence contigs, EST's, or TIGR Clustered (TC prefix) EST sequences are given in the FASTA definition line. Protein sequences derived from nucleotide sequence entries were conceptually translated.**

>H.sapiens\_Vps29.1 gi|7706441|ref|NP\_057310.1| vacuolar protein sorting 29, isoform 1; vacuolar protein sorting 29 (yeast homolog); vacuolar sorting protein VPS29/PEP11; retromer protein; x 007 protein [Homo sapiens]  
MLVVLVGLDLHIPHRCNSLPAKFKKLLVPGKIQHILCTGNLCTKESYDYLKTLAGDVHIVRGDFDENLNYPEQKVV  
TVGQFKIGLIHGQVIPWGDMAASLALLQRQFDVDILISGHTHKFEAFEHENKIFYINPGSATGAYNALETNIIPSF  
VLMDIQASTVVVTVYVYQLIGDDVKVERIEYKPK\*

>X.tropicalis\_Vps29.1 gi|52346072|ref|NP\_001005079.1| MGC89642 protein [Xenopus tropicalis]  
MLVVLVGLDLHIPHRCNSLPAKFKKLLVPGKIQHILCTGNLCTKESFDYLKTLAGDVHIVRGDFDENLNYPEQKVV  
TVGQFKIGLIHGQVIPWGDMAASLALLQRQLDVIDILISGHTRQKFEAFEHENKIFYINPGSATGAYNALENNIIPSF  
VLMDIQASTVVVTVYVYQLIGDDVKVERIEYKKS

>G.gallus\_Vps29.1 BU240962  
MLVVLVGLDLHIPHRCNSLPAKFKKLLVPGKIQHILCTGNLCTKDTYDYLKTLAGDVHVVRGDFDENLNYPEQKVV  
TVGQFKIGLIHGQVIPWGDMAASLALLQRQFDVDILISGHTHKFEAFEHENKIFYINPGSATGAYHALENNIIPSF  
VLMDIQASTVVVTVYVYQLIGDDVKVERIEYKKS\*

>D.rerio\_Vps29.1 gi|41053315|ref|NP\_956331.1| vacuolar protein sorting 29 [Danio rerio]  
MLVVLVGLDLHIPHRCNTLPAKFKKLLVPGKIQHILCTGNLCTKESYDYLKTLAGDVHIVRGDFDENLNYPEQKVV  
TVGQFKIGLIHGQVIPWGDMAASLALLQRQLDVIDILISGHTHKFEAFENENKIFYINPGSATGAYSALSNITPSF  
VLMDIQASTVVVTVYVYQLIGDDVKVERIEYKKS

>E.burgeri\_Vps29 BJ655784\_BJ653486 hagfish  
MLVVLVGLDLHIPYRSNSLPEKFKKLLVPGKIQHILCTGNLCTKESFDYLKGLAGDVHVVRGDFDENIYPEQKVV  
TVGQFRVGLVHGQVIPWGDPAASLALLQRQLDVIDILISGHTRFEAFEHDNRFYINPGSATGAFVLDNSNIVPSF  
VLMDIQASTVVVTVYVYQLIGDDVKVERIEYKKS

>B.floridae\_Vps29 BW895198  
MLVVLVGLDLHIPYRSNGMPAKFKKLLVPGKIQHILCTGNLCTKESFDYLKTLASDVHVVKGDFDENLSYPEQKVV  
TVGQFKIGLCHGHQVVPWGDIESLAMVQRQLDVIDILISGHTHKFEAFEHENKIFYINPGTATGAYNALDSGVTSPF  
VLMDIQATTVVVTVYVYQLIGDDVKVERIEYKK

>H.magnipapillata\_Vps29 BP506496  
MVLVVLVGLDLHIPYRKSGLPKFKKLLVPGKIQHILCTGNLCTKESYDYLKTLASDVHVVRGDFDENITYPEQKVV  
VTVGPFKIGLCHGHQVIPWGDPESLAMVQRQLDVIDILITGHTRFEAFEHENKIFYVNPGSASGAYNPLDLNIVPS  
FVLMDIQAGIVVAYVYQLHGDDVKVDRIEYKK

>S.purpuratus\_Vps29 AAGJ01182906 DN585406  
MLVVLVGLDLHVPHRQSGLPKFKKLLVPGKIQHILCTGNLCTKESQDYLTASDVHIVRGDFDETVSYPEQKVV  
TVGQFRVGIHGQVIPWGDVESLSMVQRQLDVIDILISGHTHKFEAYEHEGKIFYINPGSATGAYSALDANTVPSF  
VLMDIQASTVVVTVYVYQLMGDDVKVERIEYKKN

>D.melanogaster\_Vps29 gi|7296116|gb|AAF51410.1| CG4764 gene product [Drosophila melanogaster]  
MLVVLVGLDLHIPHRCSSLPKFKKLLVPGRIHHILATGNICTKESYDYLKSLANDVHIVRGDFDENLTYPEQKVV  
TVGQFRIGLCHGHQVVPGRDPEALALIQRQLDVIDILITGHTYKFEAYEHGNKIFYINPGSATGAFNPLDTNVVPSF  
VLMDIQSTTVVTVYVYQLIGDEVKVERIEYKKI

>C.intestinalis\_Vps29 TC66343 ORF 62..612 frame +2  
MVLVLVVGDMHIPFRASGLSPKFKKLLVPGKIQHILCTGNLCTRESYDYLKTLASDVHVVRGDFDENVNYPEQKV  
VTVGQFRIGMCHGHQICPWGDTESLAMLQRQLNVDILIFGHTHKFEAYEHEHSHFYINPGSITGAFSPTASEVIPS  
FVLMDIQASTVVVYVYQLQANDVKVERIEYQKS

>S.japonicum\_Vps29 gi|29841378|gb|AAP06410.1| similar to NM\_019780 vacuolar  
protein sorting 29 [Schistosoma japonicum]  
MLVLVIGDFHIPPDRKRCLHPAFKTLAPGKIQHILCTGNLTSKHMLDYKLCIGDVHVVKGDFDEGLDFPLTKVL  
SVGNFKIGLIHGHQVVPWGDQKSLAMLQRELNVLDILISGHTHKFEAYEYAGHFYINPGSATGAYSPFEKNPQPSF  
VLLDIQETVIQLYIYTLVNDHEHKVSRIEYQKNKHT

>C.elegans\_Vps29 gi|30424354|emb|CAA87426.2| Hypothetical protein ZK1128.8a  
[Caenorhabditis elegans]  
MLVLLIGDFNLPHRAANISPKFRKLLVFNKMQHVLCTGNLCSRETFDYLRTLSSDVHIVRGEFDDDELTKYPDTKV  
VTVGQFRIGVCHGHQIIPWGDQRMLELLARQLDVIDLVGTNTYECSAVEKNGRFFVDPGSATGSFVSVKTEPTTP  
SFALLDVQADNVVYLYRLIDDVAVKVDRIIYKKSSTT

>O.sativa\_Vps29 AP004683  
MVLVLALGDLHVPHRAADLPAKFKSMLVPGKIQHIICTGNLCIKEVHDYKLSLCPDLHITRGEYDEDARYPETKT  
LTIGQFKLGLCHGHQVVPWGDLDLAMLQRQLDVIDILVTGHTHQFKAYKHEGGVVINPGSATGAYSSITYDVNPS  
FVLMDIDGLRVVVYVYELIDGEVKVDKIDFKKTATMHA\*

>L.sativa\_Vps29 TC14228 ORF 156..721 frame +3  
MVLVLAIGDLHIPHRAPDLPAKFKSMLVPGKIQHIICTGNLCIKEVHDYKLSLCPDLHITRGEYDEDARYPETKT  
LTIGQFKLGLCHGHQVVPWGDLDLAMLQRQLDVIDILVTGHTHQFKAYKHEAGVVINPGSATGAYSSITYDVNPS  
FVLMDIDGLRVVVYVYELIDGEVKVDKIDFKKTSTATI

>E.globulus\_Vps29 BF707478  
MVLVLALGDLHVPHRAADLPAKFKSMLVPGKIQHIICTGNLCIKEVHDYKLTLCPLDLHITRGEYDEETRYPETKT  
LTIGQFKLGLCHGHQAIIPWGDLDLAMLQRQLDVIDILVTGHTHQFTAYKHEGGVVINPGSATGAYSSITYDVNPS  
FVLMDIDGLRVVVYVYELIDGEVKVDKIDFKKTTTTTAH

>S.tuberosum\_Vps29 TC125942 ORF 154..722 frame +1  
MVLVLALGDLHIPHRAADLPAKFKSMLVPGKIQHVICTGNLCIKEVHDYKLTLCPLDLHITRGEYDEDTRYPETKT  
LTIGQFKLGLCHGHQVIPWGDLDLAMLQRQLDVIDILVTGHTHQFTAYKHEAGVVINPGSATGAYSSITYDVNPS  
FVLMDIDALRVVVYVYELIDGEVKVDKIDFKKTTTTQSAN

>G.arboreum\_Vps29.1 TC32658 ORF 136..710 frame +1  
MVLVLALGDLHIPHRAADLPPKFKSMLVPGKIQHIICTGNLCIKEVQDYKLTLCPLDLHITRGEYDEDTRYPETKT  
LTIGQFKLGLCHGHQVIPWGDLDLAMLQRQLDVIDILVTGHTHQFTAYKHEGGVVINPGSATGAYSSITYDVNPS  
FVLMDIDGLRVVVYVYELIDGEVKVDKIDFKKTPATTHSAH

>P.balsamifera\_Vps29 BU870410  
MVLVLVLGDLHIPHRAPDLPAKFKSMLVPGKIQHIICTGNLSIKEVHDYKLTLCPLDLHITRGEYDEDARYPETKT  
LTIGQFKLGLCHGHQVVPWGDLDLAMLQRQLDVIDILVTGHTHQFTAYKHEGGVVINPGTATGAYSSITYDVNPS  
FVLMDIDGLRVVVYVYELIDGEVKVDKIDFKKTTAATHSTH\*

>G.max\_Vps29.1 TC205293 ORF 191..762 frame +2  
MVLVLALGDLHIPHRAPDLPAKFKSMLVPGKIQHIICTGNLCIKEIRDYKLTLCPLDLHITRGEYDEETKYPETKT  
LTIGQFKLGLCHGHQVIPWGDLDLAMLQRQLDVIDILVTGHTHQFTAYKHEGGVVINPGSATGAYSSITYDVNPS  
FVLMDIDGLRVVVYVYELIDGEVKVDKIDFKKSSTSHSAH

>L.japonicus\_Vps29 TC15081 ORF 211..770 frame +1  
MVLVLALGDLHIPHRAPDLPAKFKSMLVPGKIQHIICTGNLCIKEVHDYLRTLCPDLHITRGEYDEETKYPETKT  
LTIGQFKLGLCHGHQVIPWGDLDLAMLQRQLGVDILITGHTHQFTAYKHEGGVVINPGSATGAYSSMTYDVNPS  
FVLMDIDALRVVVYVYELIDGEVKVDKIDFKKTTSTS

>P.taeda\_Vps29 TC42771\_BQ197203  
MVLVLALGDLHIPHRAPDLPTKFKSMLVPGKIQHIISPGLNLCIKEVYDYLLKSLCPDLHVTRGEYDEDEPRYPETKT  
LTIGQFKLGLCHGHQVIPWGDLDLAMLQRQLDVLITGHTHQFKAYKHEGGVVINPGSATGAYSSITYEVNPS  
FVLMDIDGLRVVVVYVYELIDGEVKVDKIDFKKSPTSQ

>V.vinifera\_Vps29 TC39978 ORF 52..626 frame +1  
MVLVLALGDLHIPDRAPDLPPKFKSMLVPGKIQHIICTGNLCIKEVHDYLLKTLCPDMHIARGEYDEETRYPETKT  
LTIGQFKLGLCHGHQVIPWGDLDLAMLQRQLDVLITGHTHRFTAYKHEGGVVINPGSATGAFSSITYDVNPS  
FVLMDIDGLRVVVVYVYELIDGEVKVDKIDFKKTAATTRSTQ

>A.thaliana\_Vps29 gi|15228262|ref|NP\_190365.1| putative protein  
[Arabidopsis thaliana]  
MVLVLALGDLHVPHRAADLPPKFKSMLVPGKIQHIICTGNLCIKEIHDYLLKTLCPDLHIVRGEFDEEDARYPENKT  
LTIGQFKLGLCHGHQVIPWGDLDLAMLQRQLGVDLITGHTHQFTAYKHEGGVVINPGSATGAYSSINQDVNPS  
FVLMDIDGFRVVVYVYELIDGEVKVDKIEFKKPPTTSSGP

>C.reinhardtii\_Vps29 C\_370066 [chlre2:164094] BE238177\_TC29021  
MVLVLCIGDLHIPHRAPDLPAKFKELLKPGKIHSTICVGNVCSKVFLDYLRITISGELHVVSGDFDEFAAPEQLVL  
DIAGFRVGVCHGHQIVPWGDADAISLLQRQMGADILVTGNTHKFEARKAGSCLALNPGSATGAFSVSAAGTSQPA  
PTPSFVLMDLDGQKVTYVYVYQLVDGEVRVEKIDYNKAA

>S.cerevisiae\_Vps29 gi|6321800|ref|NP\_011876.1| Endosomal protein that is a  
subunit of the membrane-associated retromer complex essential for endosome-  
to-Golgi retrograde transport; forms a subcomplex with Vps35p and Vps26p  
that selects cargo proteins for endosome-to-Golgi retrieval; Vps29p  
[Saccharomyces cerevisiae]  
MLLLALS DAHIPDRATDLPVKFKLLSVPDKISQVALLGNSTKSYDFLK FVNQISNNITIVRGEFDNGHLPSTKK  
DKASDNSRPMEEIIPMNSIIRQGALKIGCCSGYTVVPKNDPLSLLALARQLDVIDLLWGGTHNVEAYTLEGKFFVN  
PGSCTGAFNTDWPIVFDVEDSDEAVTSEVDKPTKENQSEDDDAKGGSTGKEQPGSYTPKEGTAGERENENESNVK  
PENQFKEDEVDMSDSDINGSNSPSFCLLDIQGNTCTLYIYLYVNGEVKVDKVVYEKE

>K.lactis\_Vps29 gi|50308195|ref|XP\_454098.1| unnamed protein product  
[Kluyveromyces lactis]  
MLLLALS DAHIPERAIDVPLKFRKLLNVPNKIQQVTLGNCTKSASF LKFVNTISENIVFVRGEFDPATVSTTKN  
PAEEMPLSTVISQGPFRIGCCNGYTLVPKNDPLSLLTLARQLDVIDLLWGGTHNVEAYTLEGKFFINPGSCTGAF  
STDWVQEDVEENYKTSEQQEPAEASTNGSNQPKIKEEIKEP SNNDSEKSGEDKADIIEDKGNSEEHLQEGKEY  
EHDSSDDEFDDIDINGGGIPSFCLLDIQDITCTLYIYTYVDNEIKVDKVVYRKD

>C.albicans\_Vps29 gi|68473870|ref|XP\_719038.1| hypothetical protein  
Ca019\_6076 [Candida albicans SC5314]  
MLTLAIGDLFVPERAVDLPKFRKLLAPQPNNTPSNSKINQVICLGNITNSSTILQFLTNI SPQFNLVKGEFDNP  
VVLSSQQLSSLNKSSNIPLYNRFVHDNLKIGYTNGFQVIPRGDPLALSAFARELDVDVLIWGGTHKVEAYTLDGKF  
FINPGSATGAFNFDWPEDEEEREADKSDQDDDEATDKESHDTTEEAEPKVENETSTASDDFKQTLHEVSEINSN  
IPSFCLLDTHGSTCILYIYTQIDGEVKVDKVTYTKD

>S.pombe\_Vps29 gi|19115219|ref|NP\_594307.1| similar to yeast vacuolar  
sorting protein VPS29/PEP11 [Schizosaccharomyces pombe]  
MLVLVIGDFHIPDRAPKLSEKFRQLLIPGKISQIICLGNLTSTSVYEYLKHKVCSDLKLVKGAFDISSKAPIAGKI  
TLGSFKIGYTNHGLVVPQDSPEALSILAREMDADILLFGGTHKFAAYELDGCFFVNP GSATGAPNVSAVEDDEKI  
VPSFVLMDVQGAVLILYVYRIFDGEVRVEKMQYRKPE

>A.fumigatus\_Vps29 contig4873 modified from gi|66849950|gb|EAL90277.1|  
vacuolar protein sorting 29, putative [Aspergillus fumigatus Af293]  
MTRSLVLVIGDLFIPDRAPDLPAKFRKLLTPGKIGQILCLGNLTDRETFEFLRQVAPDLQLVKGDFD VDSPNLPL  
SKVVTGHSRIGFTHTGHTIIPPGDADALLIARQMDVDILLWGGTHRFEAFEMEGRFFVNP GSATGAMSTGYWPE  
GEEPVP SFCLMDIQGDVLLVLYVYQLKTDANGVETVAVEKVSFRKNNIPSS\*

>P.nodorum\_Vps29 gi|62183417|gb|AAGI01000106.1| Phaeosphaeria nodorum SN15 cont1.106, whole genome shotgun sequence  
MASRLVLVLGDLFIPDRAADIPTKFKKLLAPGKIGQILCLGNITDRETYEFLRAIAPDLQIVKGFDFVEAPNLAL  
SKVVTGSLRIGFTHGHTIIPPGDGSLLIAARQMDVDVLLWGGTHKFEAYEMEGKFFVNPGSATGAMTTGWWT  
DEDPTPSFVLMVDVQGDVVLVYVYQLRKAEGNENVAVEKVSFRKNGGGVS

>N.crassa\_Vps29 gi|32415565|ref|XP\_328261.1| hypothetical protein [Neurospora crassa]  
MAFLILVIGDLHIPDRALDIPAKFKKLLAPGKISQTLCLGNLTDSTYELRTIAPDLKIVRGRMDVEATSLPLT  
SVVTHGNLRIGFLEGFTLVSNEPDLLLAEANRLDVDVLCWGGTHKFEYMDKFFVNPGSATGAFTTTAASWAV  
NLGSNGEGQKEQDKGFDEDEEVVPSFCLMDVQGISLTLVYVYQLRKADEKGVENVAVEKVYTKPVEPTGAGGAAAG  
AGAAASGAASVSSS

>C.neoformans\_Vps29 gi|58258243|ref|XP\_566534.1| retrograde transport, endosome to Golgi-related protein, putative [Cryptococcus neoformans var. neoformans JEC21]  
MVLVLVIGDLHIPNLVHDLPAKFKKLLVPGKIGQIICTGNVCDKETYDYLRRTAPEVHVVRGEFDENPHFPPLSLI  
IQHQSLRIGVVHGQVVPAGDPMMLAALARQMDVDVLSGGTHRFESFEFEGRFFVNPGSATGAWSSLWNGEVT  
SFALMDIQGPVIVTYVYQLVDGVEVKVDKVEYRKPDPPTSEIQSQSTRSEVAARW

>U.maydis\_Vps29 gi|49072008|ref|XP\_400293.1| hypothetical protein UM02678.1 [Ustilago maydis 521]  
MLVLVIGDLHIPFRAHDLPAKFKKLLVPGKIQQIICTGNVCNTDYLHLYLRTIAGDVHLVKGDYDDNPHFPSSLIL  
NHPPLRIGVLHGHQVVPAGDTQSLAAVARAMDVIDILLTGHTRFEAFELEGRFFVNPGSATGAWHPTWPLRDPAS  
LAALSSERTAAKTEDATIADKKADEPKPKKGAKTSDNKKNDSSAKDKPSASELKDANKDAESNKDGDDEEEEAKE  
AAPVPSFALLDIQGAVVVYVYQLIDGDVVKVEKIEYRKNLDSNSLALQRGASGNAVAVGASATNYGQYGR

>P.chrysosporium\_Vps29 gi|46851680|gb|AADS01000252.1| Phanerochaete chrysosporium RP-78 White\_Rot252, whole genome shotgun sequence  
MVLVLVIGDLHIPHRIHDLPAKFKKLLVPGKIQQILCTGNLCDRETYEYLRVSPDVHVVRGDYDESALPLSVTV  
THSPIRIGVIHGHQCVPGDLDLSAIARQMDVDVLSGHTHVQAVEYDNRFFVNPGSATGAWIGNINGEPTPT  
FALMDIQGPVVVYVYQLIEGEVRVEKIEYRKDIETAKEPPRSMPQSIPNSPPPQQAVW\*

>R.oryzae\_Vps29 gi|61601706|gb|AACW01000352.1| Rhizopus oryzae RA 99-880 cont1.77, whole genome shotgun sequence  
MLVLVIGDLHIPQRAHDLPLKFKKLLIPGKIQKIICTGNITDKSTLDYLRSIAGDITVVKGDNDQDMQLPQTKVL  
QVGNVHIGIIGHGQIIPWGDDESLSITARQLEVDVLLTGHTRLEVYENGGRFFVNPGSATGAYSSMNTDESIPS  
FVLMDIQASVVVYVYKLIINDEVKVEKIEFTKHLANKIL

>E.histolytica\_Vps29 gi|13276202|emb|CAC34071.1| putative vacuolar sorting protein [Entamoeba histolytica]  
MLVLVIGDFHVPHRSAAIQVFLDRLNTGRIQTVLCTGNLCKGKETYDILRTLAREVHVVKGFDEMQLNETEVI  
KIGNFKIGLMHGHQVVPWGDREALAIYQRQLDVIDILITGHTHKLETKEVGGKYFLNPGSATGAYSPLVDNVPVPSF  
MLLEINDELTIYEYTLVDGSVKICERVDFNKKQQQ

>T.cruzi\_Vps29 gi|70883998|gb|EAN96879.1| vacuolar sorting protein, putative [Trypanosoma cruzi]  
MVLVLVVGDLHIPQRAAAIPEEFTQMFSQGRINIVLITGNVGCREMYDYFRVVAPEVYCAKGEFDQWSHTQLKEI  
HVITVEDLKIGLVHGHQVVPWGDRLSLAILQRKLDVDVLSGATHHCKTFEFDGHLFINPGSITGAFTPAHLDVD  
PTFVLLDIKEKTVTFSYVYTRREGAAGGENFTIKRKVWTKE

>E.tenella\_Vps29 contig177  
MAGNFTDFGDLVLIIGDFHVPQRAVDLPPCFRELLHTDKIRHVLCTGNVGNGLILDFLRGIAGSVHIVKGMDEG  
LDFPEYKILQFGEFKVALLHGHQVVPWGDADALLQWQRRLDCDIVVSGHTHSNSVREVEGCFFINPGSATGAYQP  
WAPSPTPSFMLMALQASVVLVYIYEERDGAEVVMSEFTKPAKK\*

>P.falciparum\_Vps29 gi|23509285|ref|NP\_701952.1| vacuolar protein sorting 29, putative [Plasmodium falciparum 3D7]  
MSGKLEDIGELVLLIGDFHSPIRNLGLPDCFKELLKTDKIKHVLCTGNVGCNENLELLKNIADSVHITKGMDDN  
FDFPEDITLTCIGDFKISLIHGHQIIPWGDMMNALLQWQKKYDSDIIISGHTHKNSIVQYEGKYFINPGSVTGAFQP  
WLSEPTPTFILMAVAKSNIVLYVYEEKNGKTNVEMSELHKSTVI

# Supplementary Figure 3

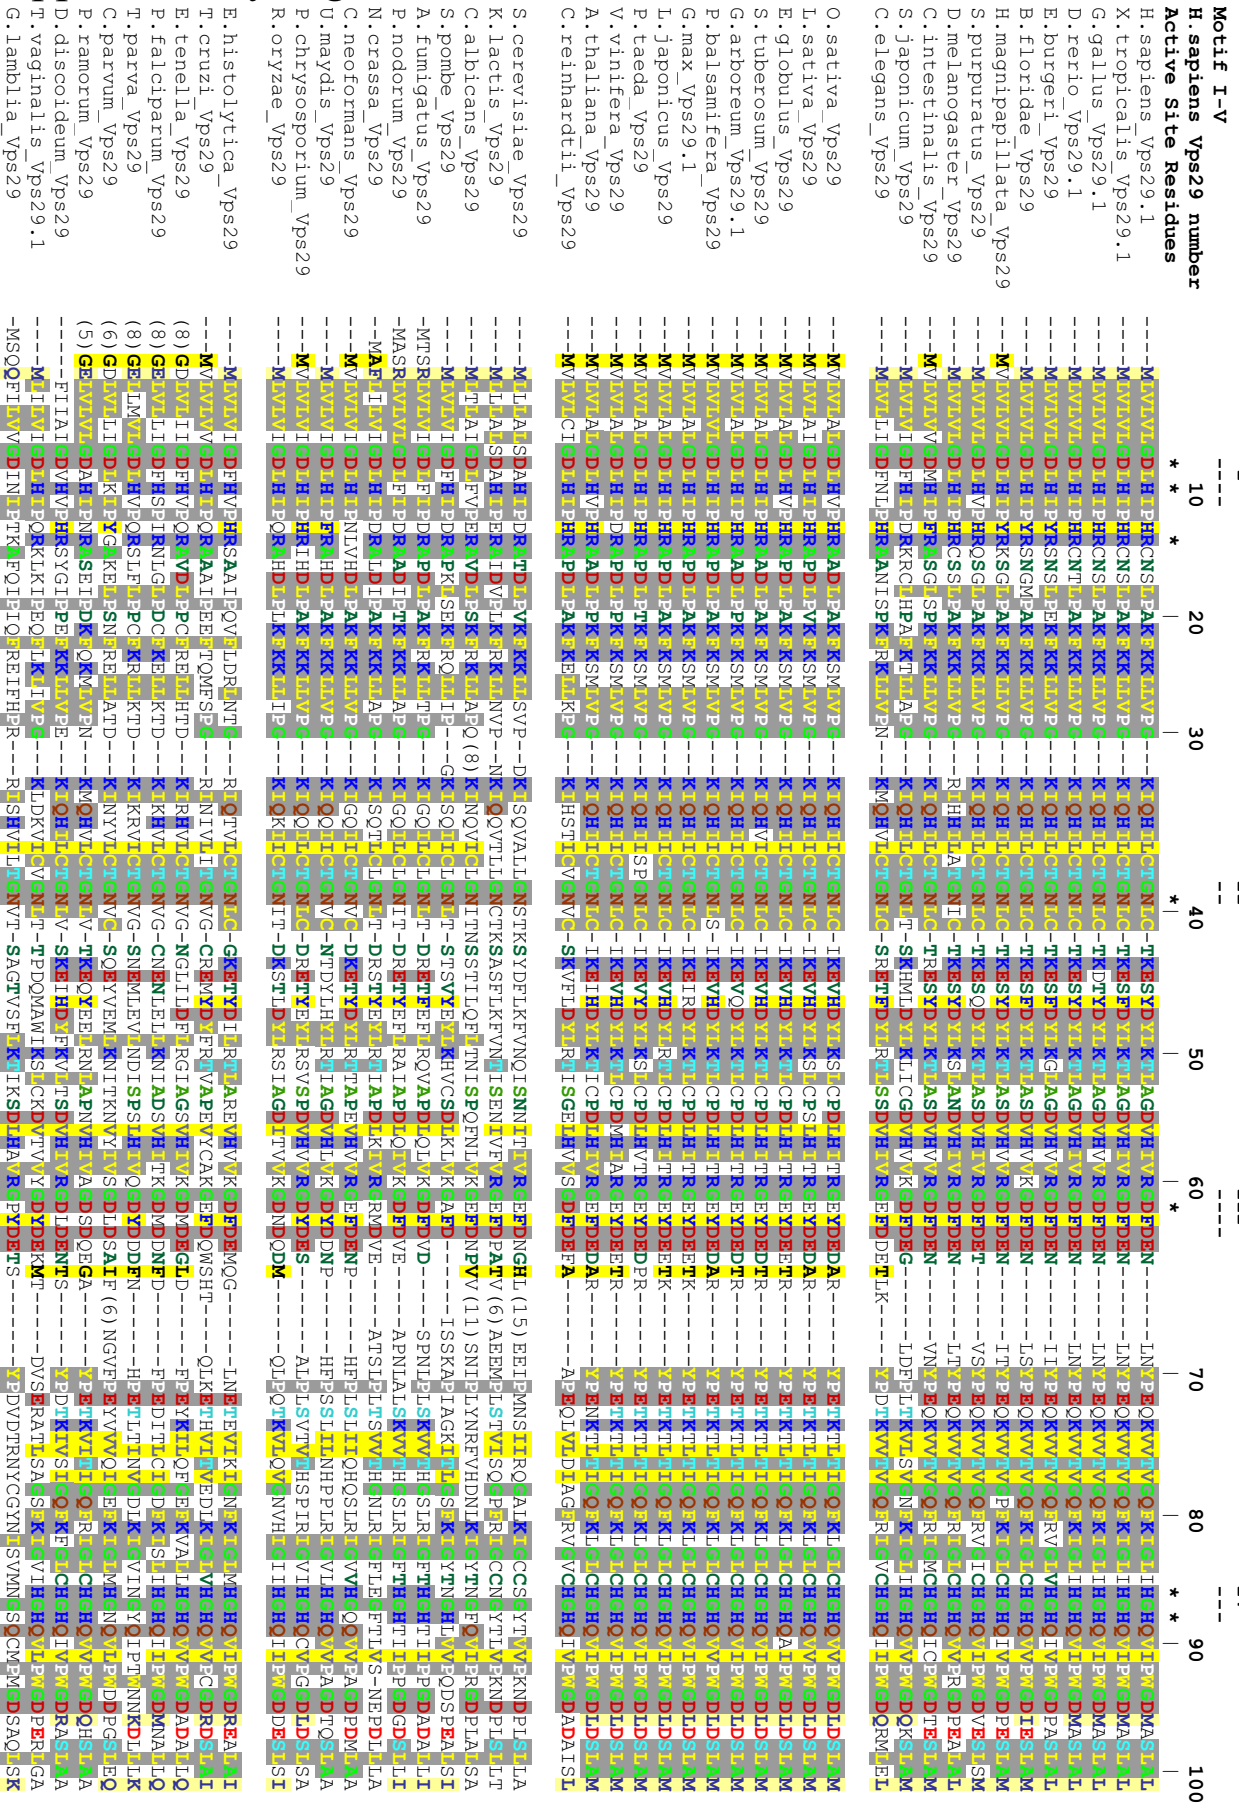

Supplement: bj3980399add.pdf [file bj3980399add.pdf]
